# Supplementary material
Source: ML conference proceedings conference paper supplement (https://proceedings.mlr.press/v97/liu19a.html)
Supplement: Supplementary file 1 [file liu19a-supp.pdf]

## A. Proof of Lemma 1

In this section, we prove the results on the error generated when solving the subproblem (3.2) inexactly by Procedure 1. Before proving Lemma 1, we will first prove a simpler case in Lemma 3, where the subproblem iterator  $S$  is the proximal gradient step.

**Lemma 3.** *Take Assumption 1. Suppose in Procedure 1, we choose  $S$  as the proximal gradient step with step size  $\gamma = \eta \frac{\lambda_{\min}(M)}{\lambda_{\max}^2(M)}$ , and is repeat it  $p$  times, where  $p \geq 1$ . Then,  $w_{t+1} = w_{t+1}^p$  is an approximate solution to (3.2) that satisfies*

$$\mathbf{0} \in \partial\psi(w_{t+1}) + \frac{1}{\eta}M(w_{t+1} - w_t) + \tilde{\nabla}_t + M\varepsilon_{t+1}^p, \quad (\text{A.1})$$

$$\|\varepsilon_{t+1}^p\|_M \leq \frac{c(p)}{\eta} \|w_{t+1} - w_t\|_M, \quad (\text{A.2})$$

where

$$c(p) = (\kappa(M) + 1)\kappa(M) \frac{\tau^p + \tau^{p-1}}{1 - \tau^p},$$

and  $\tau = \sqrt{1 - \kappa^{-2}(M)} < 1$ .

*Proof of Lemma 3.* The optimization problem in (3.2) is of the form

$$\underset{y \in \mathbb{R}^d}{\text{minimize}} h_1(y) + h_2(y), \quad (\text{A.3})$$

for  $h_1(y) = \psi(y)$  and  $h_2(y) = \frac{1}{2\eta}\|y - w_t\|_M^2 + \langle \tilde{\nabla}, y \rangle$ . With our choice of  $S$  as the proximal gradient descent step, the iterations in Procedure 1 are

$$\begin{aligned} w_{t+1}^0 &= w_t, \\ w_{t+1}^{i+1} &= \mathbf{prox}_{\gamma h_1}(w_{t+1}^i - \gamma \nabla h_2(w_{t+1}^i)), \\ w_{t+1} &= w_{t+1}^p, \end{aligned}$$

where  $i = 0, 1, \dots, p-1$ . From the definition of  $\mathbf{prox}_{\gamma h_1}$ , we have

$$\mathbf{0} \in \partial h_1(w_{t+1}^p) + \nabla h_2(w_{t+1}^{p-1}) + \frac{1}{\gamma}(w_{t+1}^p - w_{t+1}^{p-1}).$$

Compare this with (A.1) gives

$$M\varepsilon_{t+1}^p = \frac{1}{\gamma}(w_{t+1}^p - w_{t+1}^{p-1}) + \nabla h_2(w_{t+1}^{p-1}) - \nabla h_2(w_{t+1}^p).$$

To bound the right hand side, let  $w_{t+1}^*$  be the solution of (A.3),  $\alpha = \frac{\lambda_{\min}(M)}{\eta}$ , and  $\beta = \frac{\lambda_{\max}(M)}{\eta}$ . Then  $h_1(y)$  is convex and  $h_2(y)$  is  $\alpha$ -strongly convex and  $\beta$ -Lipschitz differentiable. Consequently, Prop. 26.16(ii) of (Bauschke et al., 2017) gives

$$\|w_{t+1}^i - w_{t+1}^*\| \leq \tau^i \|w_{t+1}^0 - w_{t+1}^*\|, \quad \forall i = 0, 1, \dots, p,$$

where  $\tau = \sqrt{1 - \gamma(2\alpha - \gamma\beta^2)}$ .

Let  $a_i = \|w_{t+1}^i - w_{t+1}^*\|$ . Then,  $a_i \leq \tau^i a_0$ . We can derive

$$\begin{aligned} \|M\varepsilon_{t+1}^p\| &\leq \left(\frac{1}{\gamma} + \beta\right) \|w_{t+1}^p - w_{t+1}^{p-1}\| \\ &\leq \left(\frac{1}{\gamma} + \beta\right) (a_p + a_{p-1}) \leq \left(\frac{1}{\gamma} + \beta\right) (\tau^p + \tau^{p-1}) a_0. \end{aligned}$$

On the other hand, we have

$$\|w_{t+1} - w_t\| \geq a_0 - a_p \geq (1 - \tau^p) a_0.$$

Combining these two equations yields

$$\|M\varepsilon_{t+1}^p\| \leq b(p) \|w_{t+1} - w_t\|, \quad (\text{A.4})$$

where

$$b(p) = \left(\frac{1}{\gamma} + \frac{\lambda_{\max}(M)}{\eta}\right) \frac{\tau^p + \tau^{p-1}}{1 - \tau^p}. \quad (\text{A.5})$$

Finally, let the eigenvalues of  $M$  be  $0 < \lambda_1 \leq \lambda_2 \leq \dots \leq \lambda_d$ , with orthonormal eigenvectors  $v_1, v_2, \dots, v_d$ . Let  $\varepsilon_{t+1}^p$  and  $w_{t+1} - w_t$  be decomposed by

$$\varepsilon_{t+1}^p = \sum_{i=1}^d \alpha_i v_i,$$

$$w_{t+1} - w_t = \sum_{i=1}^d \beta_i v_i.$$

then

$$\begin{aligned} \|\varepsilon_{t+1}^p\|_M &= \sqrt{\sum_{i=1}^d \lambda_i \alpha_i^2} \leq \sqrt{\frac{1}{\lambda_{\min}(M)} \sum_{i=1}^d \lambda_i^2 \alpha_i^2} \\ &= \sqrt{\frac{1}{\lambda_{\min}(M)}} \|M\varepsilon_{t+1}^p\|, \\ \|w_{t+1} - w_t\| &= \sqrt{\sum_{i=1}^d \beta_i^2} \leq \sqrt{\frac{1}{\lambda_{\min}(M)} \sum_{i=1}^d \lambda_i \beta_i^2} \\ &= \sqrt{\frac{1}{\lambda_{\min}(M)}} \|w_{t+1} - w_t\|_M. \end{aligned}$$

Combine these two inequalities with (A.4), we arrive at

$$\|\varepsilon_{t+1}^p\|_M \leq c(p) \|w_{t+1} - w_t\|_M, \quad (\text{A.6})$$

where

$$c(p) = \frac{1}{\lambda_{\min}(M)} b(p) = \frac{\frac{1}{\gamma} + \frac{\lambda_{\max}(M)}{\eta}}{\lambda_{\min}(M)} \frac{\tau^p + \tau^{p-1}}{1 - \tau^p}.$$

□

Now, we are ready to prove Lemma 1, the techniques are similar to the proof of Lemma 3.

*Proof of Lemma 1.* We want to find  $c(p)$  such that

$$\mathbf{0} \in \partial\psi(w_{t+1}) + \frac{1}{\eta}M(w_{t+1} - w_t) + \tilde{\nabla}_t + M\varepsilon_{t+1}^p, \quad (\text{A.7})$$

$$\|\varepsilon_{t+1}^p\|_M \leq \frac{c(p)}{\eta} \|w_{t+1} - w_t\|_M, \quad (\text{A.8})$$

Take  $i = r - 1$  and  $j = p_0 - 1$ , then the optimality condition of the problem in line 5 of Algorithm 3 is

$$\mathbf{0} \in \partial\psi(w_{t+1}^{(r-1,p_0)}) + \frac{1}{\gamma}(w_{t+1}^{(r-1,p_0)} - u_{t+1}^{(r-1,p_0)}) + \nabla h_2(u_{t+1}^{(r-1,p_0)}),$$

compare this with (A.7), we have

$$\begin{aligned} M\varepsilon_{t+1}^p &= \frac{1}{\gamma}(w_{t+1}^{(r-1,p_0)} - u_{t+1}^{(r-1,p_0)}) + \nabla h_2(u_{t+1}^{(r-1,p_0)}) \\ &\quad - \frac{1}{\eta}M(w_{t+1} - w_t) - \tilde{\nabla}_t \\ &= \frac{1}{\gamma}(w_{t+1}^{(r-1,p_0)} - u_{t+1}^{(r-1,p_0)}) \\ &\quad + \frac{1}{\eta}M(u_{t+1}^{(r-1,p_0)} - w_{t+1}) \end{aligned}$$

where

$$u_{t+1}^{(r-1,p_0)} = w_{t+1}^{(r-1,p_0-1)} + \frac{\theta_{p_0-2} - 1}{\theta_{p_0-1}}(w_{t+1}^{(r-1,p_0-1)} - w_{t+1}^{(r-1,p_0-2)}).$$

As a result,

$$\|M\varepsilon_{t+1}^p\| \leq \left\| \frac{1}{\gamma}(w_{t+1}^{(r-1,p_0)} - u_{t+1}^{(r-1,p_0)}) \right\| \quad (\text{A.9})$$

$$\begin{aligned} &+ \left\| \frac{1}{\eta}M(u_{t+1}^{(r-1,p_0)} - w_{t+1}) \right\| \\ &\leq \left\| \frac{1}{\gamma}(w_{t+1}^{(r-1,p_0)} - w_{t+1}^{(r-1,p_0-1)}) \right\| \\ &+ \frac{1}{\gamma} \left\| \frac{\theta_{p_0-2} - 1}{\theta_{p_0-1}}(w_{t+1}^{(r-1,p_0-1)} - w_{t+1}^{(r-1,p_0-2)}) \right\| \\ &+ \left\| \frac{1}{\eta}M(w_{t+1}^{(r-1,p_0-1)} - w_{t+1}) \right\| \\ &+ \left\| \frac{1}{\eta} \frac{\theta_{p_0-2} - 1}{\theta_{p_0-1}} M(w_{t+1}^{(r-1,p_0-1)} - w_{t+1}^{(r-1,p_0-2)}) \right\|, \end{aligned} \quad (\text{A.10})$$

Let the solution of (3.2) be  $w_{t+1}^*$ . By Theorem 4.4 of (Beck & Teboulle, 2009), for any  $0 \leq i \leq r - 1$  and  $0 \leq j \leq p_0$  we have

$$\Psi(w_{t+1}^{(i,j)}) - \Psi(w_{t+1}^*) \leq \frac{2\lambda_{\max}(M)\|w_{t+1}^{(i,0)} - w_{t+1}^*\|^2}{\eta j^2}.$$

On the other hand, the strong convexity of  $\Psi = h_1 + h_2$  gives

$$\Psi(w_{t+1}^{(i,j)}) - \Psi(w_{t+1}^*) \geq \frac{\lambda_{\min}(M)}{2\eta} \|w_{t+1}^{(i,j)} - w_{t+1}^*\|^2.$$

Therefore,

$$\|w_{t+1}^{(i,j)} - w_{t+1}^*\| \leq \sqrt{\frac{4\kappa(M)}{j^2}} \|w_{t+1}^{(i,0)} - w_{t+1}^*\|. \quad (\text{A.11})$$

Now, let us use (A.11) repeatedly to bound the right hand side of (A.10). For example, the first term can be bounded as

$$\begin{aligned} &\left\| \frac{1}{\gamma}(w_{t+1}^{(r-1,p_0)} - w_{t+1}^{(r-1,p_0-1)}) \right\| \\ &\leq \frac{1}{\gamma} \|w_{t+1}^{(r-1,p_0)} - w_{t+1}^*\| \\ &\quad + \frac{1}{\gamma} \|w_{t+1}^{(r-1,p_0-1)} - w_{t+1}^*\| \\ &\leq \frac{1}{\gamma} \left( \frac{4\kappa(M)}{p_0^2} \right)^{\frac{r-1}{2}} \|w_{t+1}^{(0,0)} - w_{t+1}^*\| \\ &\quad + \frac{1}{\gamma} \left( \frac{4\kappa(M)}{p_0^2} \right)^{\frac{r-1}{2}} \left( \frac{4\kappa(M)}{(p_0-1)^2} \right)^{\frac{1}{2}} \|w_{t+1}^{(0,0)} - w_{t+1}^*\|. \end{aligned}$$

Similarly, the rest of the terms can be bounded as follows,

$$\begin{aligned} &\frac{1}{\gamma} \left\| \frac{\theta_{p_0-2} - 1}{\theta_{p_0-1}}(w_{t+1}^{(r-1,p_0-1)} - w_{t+1}^{(r-1,p_0-2)}) \right\| \\ &\leq \frac{1}{\gamma} \left( \frac{4\kappa(M)}{p_0^2} \right)^{\frac{r-1}{2}} \left( \frac{4\kappa(M)}{(p_0-1)^2} \right)^{\frac{1}{2}} \|w_{t+1}^{(0,0)} - w_{t+1}^*\| \\ &\quad + \frac{1}{\gamma} \left( \frac{4\kappa(M)}{p_0^2} \right)^{\frac{r-1}{2}} \left( \frac{4\kappa(M)}{(p_0-2)^2} \right)^{\frac{1}{2}} \|w_{t+1}^{(0,0)} - w_{t+1}^*\|, \\ &\left\| \frac{1}{\eta}M(w_{t+1}^{(r-1,p_0-1)} - w_{t+1}) \right\| \\ &\leq \frac{\lambda_{\max}(M)}{\eta} \left( \frac{4\kappa(M)}{p_0^2} \right)^{\frac{r-1}{2}} \left( \frac{4\kappa(M)}{(p_0-1)^2} \right)^{\frac{1}{2}} \|w_{t+1}^{(0,0)} - w_{t+1}^*\|, \\ &\quad + \frac{\lambda_{\max}(M)}{\eta} \left( \frac{4\kappa(M)}{p_0^2} \right)^{\frac{r-1}{2}} \|w_{t+1}^{(0,0)} - w_{t+1}^*\|, \\ &\left\| \frac{1}{\eta} \frac{\theta_{p_0-2} - 1}{\theta_{p_0-1}} M(w_{t+1}^{(r-1,p_0-1)} - w_{t+1}^{(r-1,p_0-2)}) \right\| \\ &\leq \frac{\lambda_{\max}(M)}{\eta} \left( \frac{4\kappa(M)}{p_0^2} \right)^{\frac{r-1}{2}} \left( \frac{4\kappa(M)}{(p_0-1)^2} \right)^{\frac{1}{2}} \|w_{t+1}^{(0,0)} - w_{t+1}^*\| \\ &\quad + \frac{\lambda_{\max}(M)}{\eta} \left( \frac{4\kappa(M)}{p_0^2} \right)^{\frac{r-1}{2}} \left( \frac{4\kappa(M)}{(p_0-2)^2} \right)^{\frac{1}{2}} \|w_{t+1}^{(0,0)} - w_{t+1}^*\|, \end{aligned}$$

where in the first and third estimate we have used  $\frac{\theta_{p_0-2}-1}{\theta_{p_0-1}} \leq$

$\frac{\theta_{p_0-2}}{\theta_{p_0-1}} < 1$ . On the other hand, we have

$$\begin{aligned} \|w_{t+1} - w_t\| &= \|w_{t+1}^{(r-1, p_0)} - w_{t+1}^{(0,0)}\| \\ &\geq \|w_{t+1}^{(0,0)} - w_{t+1}^*\| - \|w_{t+1}^{(r-1, p_0)} - w_{t+1}^*\| \\ &\geq (1 - (\frac{4\kappa(M)}{p_0^2})^{\frac{1}{2}}) \|w_{t+1}^{(0,0)} - w_{t+1}^*\|. \end{aligned}$$

As a result, taking  $\gamma = \frac{\lambda_{\max}(M)}{\eta}$ ,  $w_{t+1}^{(0,0)} = w_t$ ,  $w_{t+1}^{(r-1, p_0)} = w_{t+1}$  and  $\tau = (\frac{4\kappa(M)}{p_0^2})^{\frac{1}{2p_0}}$  yields

$$\|M\varepsilon_{t+1}^p\| \leq 2 \frac{\lambda_{\max}(M)}{\eta} \frac{b(p)}{1 - \tau^p} \|w_{t+1} - w_t\|,$$

where

$$\begin{aligned} b(p) &= \tau^{p-p_0} \left( (\frac{4\kappa(M)}{(p_0-1)^2})^{\frac{1}{2}} + (\frac{4\kappa(M)}{(p_0-2)^2})^{\frac{1}{2}} \right) \\ &\quad + \tau^p + \tau^{p-p_0} (\frac{4\kappa(M)}{(p_0-1)^2})^{\frac{1}{2}}. \end{aligned} \quad (\text{A.12})$$

Similar to the end of proof of Lemma 3, we have

$$\|M\varepsilon_{t+1}^p\|_M \leq 2 \frac{\kappa(M)}{\eta} \frac{b(p)}{1 - \tau^p} \|w_{t+1} - w_t\|_M.$$

Now, let us choose  $p_0$  such that  $\tau = (\frac{4\kappa(M)}{p_0^2})^{\frac{1}{2p_0}}$  is minimized, a simple calculation yields

$$p_0^* = 2e\sqrt{\kappa(M)}.$$

In order for  $p_0$  to be an integer, we can take

$$p_0 = \lceil 2e\sqrt{\kappa(M)} \rceil,$$

then

$$\begin{aligned} \tau &= (\frac{4\kappa(M)}{p_0^2})^{\frac{1}{2p_0}} \leq (\frac{1}{e^2})^{\frac{1}{2\lceil 2e\sqrt{\kappa(M)} \rceil}} \leq (\frac{1}{e^2})^{\frac{1}{2(2e\sqrt{\kappa(M)}+1)}} \\ &= \exp(-\frac{1}{2e\sqrt{\kappa(M)}+1}). \end{aligned}$$

Finally, Let us show that  $b(p)$  in (A.12) can be bounded by  $7\tau^p$ , and the desired bound (A.8) on  $\|\varepsilon_{t+1}^p\|_M$  follows.

First, we have

$$\tau^{-p_0} (\frac{4\kappa(M)}{p_0-1})^{\frac{1}{2}} = (\frac{p_0}{p_0-1})^{\frac{1}{p_0}},$$

and

$$p_0 = \lceil 2e\sqrt{\kappa(M)} \rceil \geq \lceil 2e \rceil = 6.$$

On the other hand, a simple calculation shows that  $(\frac{p_0}{p_0-1})^{\frac{1}{p_0}}$  is decreasing in  $p_0$ , therefore

$$\tau^{-p_0} (\frac{4\kappa(M)}{p_0-1})^{\frac{1}{2}} \leq (\frac{6}{5})^{\frac{1}{6}} < 2,$$

Similarly, one can show that

$$\tau^{-p_0} (\frac{4\kappa(M)}{p_0-2})^{\frac{1}{2}} \leq (\frac{6}{4})^{\frac{1}{6}} < 2.$$

Combining these two inequalities with (B.2) yields

$$b(p) \leq 7\tau^p. \quad \square$$

## B. Proof of Theorem 1

In this section, we proceed to establish the convergence of inexact preconditioned SVRG as in Algorithm 1. The proof is similar to that of Theorem D.1 of (Allen-Zhu, 2018).

Before proving Theorem 1, let us first prove several lemmas.

First, the inexact optimality condition (4.1) gives the following descent:

**Lemma 4.** *Under Assumption 1, suppose that (4.1) holds. Then, for any  $u \in \mathbb{R}^d$  we have*

$$\begin{aligned} &\langle \tilde{\nabla}_t, w_t - u \rangle + \psi(w_{t+1}) - \psi(u) \\ &\leq \langle \tilde{\nabla}_t, w_t - w_{t+1} \rangle + \frac{\|u - w_t\|_M^2}{2\eta} \\ &\quad - \frac{1}{2\eta} \|u - w_{t+1}\|_M^2 - \frac{1}{2\eta} \|w_{t+1} - w_t\|_M^2 \\ &\quad + \langle M\varepsilon_{t+1}^p, u - w_{t+1} \rangle. \end{aligned}$$

*Proof.* First, let us rewrite the left hand side as

$$\begin{aligned} &\langle \tilde{\nabla}_t, w_t - u \rangle + \psi(w_{t+1}) - \psi(u) \\ &= \langle \tilde{\nabla}_t, w_t - w_{t+1} \rangle + \langle \tilde{\nabla}_t, w_{t+1} - u \rangle + \psi(w_{t+1}) - \psi(u). \end{aligned}$$

By (4.1) and the definition of subdifferential we have

$$\psi(u) \geq \psi(w_{t+1}) - \langle \tilde{\nabla}_t + \frac{1}{\eta} M(w_{t+1} - w_t) + M\varepsilon_{t+1}^p, u - w_{t+1} \rangle.$$

Combining these two gives

$$\begin{aligned} &\langle \tilde{\nabla}_t, w_t - u \rangle + \psi(w_{t+1}) - \psi(u) \\ &\leq \langle \tilde{\nabla}_t, w_t - w_{t+1} \rangle \\ &\quad + \langle \frac{1}{\eta} M(w_{t+1} - w_t) + M\varepsilon_{t+1}^p, u - w_{t+1} \rangle \\ &= \langle \tilde{\nabla}_t, w_t - w_{t+1} \rangle + \frac{\|u - w_t\|_M^2}{2\eta} \\ &\quad - \frac{1}{2\eta} \|u - w_{t+1}\|_M^2 - \frac{1}{2\eta} \|w_{t+1} - w_t\|_M^2 \\ &\quad + \langle M\varepsilon_{t+1}^p, u - w_{t+1} \rangle, \end{aligned}$$

where in the last equality we have applied

$$\langle a - b, c - a \rangle_M = -\frac{1}{2} \|a - b\|_M^2 - \frac{1}{2} \|a - c\|_M^2 + \frac{1}{2} \|b - c\|_M^2. \quad \square$$

Based on lemma 4, we have

**Lemma 5.** *Under Assumption 1, if the iterator  $S$  in Procedure 1 is proximal gradient descent or FISTA with restart, then, for any  $a > 0$ ,  $\eta \leq \frac{1-2c(p)a}{2L_f^M}$ , and  $u \in \mathbb{R}^d$  we have*

$$\begin{aligned} & \mathbb{E}[F(w_{t+1}) - F(u)] \\ & \leq \mathbb{E}[\eta \|\tilde{\nabla}_t - \nabla f(w_t)\|_{M^{-1}}^2 + \frac{1 - \eta\sigma_f^M}{2\eta} \|u - w_t\|_M^2 \\ & \quad - (\frac{1}{2\eta} - \frac{c(p)}{2\eta a}) \|u - w_{t+1}\|_M^2]. \end{aligned}$$

*Proof.* We have

$$\begin{aligned} & \mathbb{E}[F(w_{t+1}) - F(u)] \\ & = \mathbb{E}[f(w_{t+1}) - f(u) + \psi(w_{t+1}) - \psi(u)] \\ & \leq \mathbb{E}[f(w_t) + \langle \nabla f(w_t), w_{t+1} - w_t \rangle \\ & \quad + \frac{L_f^M}{2} \|w_t - w_{t+1}\|_M^2 - f(u) + \psi(w_{t+1}) - \psi(u)] \\ & \mathbb{E}[\langle \nabla f(w_t), w_t - u \rangle - \frac{\sigma_f^M}{2} \|u - w_t\|_M^2 \\ & \quad + \langle \nabla f(w_t), w_{t+1} - w_t \rangle + \frac{L_f^M}{2} \|w_t - w_{t+1}\|_M^2 \\ & \quad + \psi(w_{t+1}) - \psi(u)] \\ & = \mathbb{E}[\langle \tilde{\nabla}_t, w_t - u \rangle - \frac{\sigma_f^M}{2} \|u - w_t\|_M^2 \tag{B.1} \\ & \quad + \langle \nabla f(w_t), w_{t+1} - w_t \rangle \\ & \quad + \frac{L_f^M}{2} \|w_t - w_{t+1}\|_M^2 + \psi(w_{t+1}) - \psi(u)], \tag{B.2} \end{aligned}$$

where the first and second inequality are due to the strong convexity and smoothness under  $\|\cdot\|_M$  in Assumption 1, respectively. the last equality is due to  $\mathbb{E}[\tilde{\nabla}_t] = \nabla f(w_t)$ .

On the other hand, recall that Lemma 4 gives

$$\begin{aligned} & \langle \tilde{\nabla}_t, w_t - u \rangle + \psi(w_{t+1}) - \psi(u) \\ & \langle \tilde{\nabla}_t, w_t - w_{t+1} \rangle + \frac{\|u - w_t\|_M^2}{2\eta} \\ & - \frac{1}{2\eta} \|u - w_{t+1}\|_M^2 - \frac{1}{2\eta} \|w_{t+1} - w_t\|_M^2 \\ & + \langle M\varepsilon_{t+1}^p, u - w_{t+1} \rangle, \end{aligned}$$

For the last term we can apply Cauchy-Schwartz as follows,

$$\langle M\varepsilon_{t+1}^p, u - w_{t+1} \rangle \leq \|\varepsilon_{t+1}^p\|_M \|u - w_{t+1}\|_M,$$

from Lemma 3 and Lemma 1 we know that

$$\|\varepsilon_{t+1}^p\|_M \leq \frac{c(p)}{\eta} \|w_{t+1} - w_t\|_M.$$

Therefore, by Young's inequality, we have for any  $a > 0$  that

$$\begin{aligned} & \langle M\varepsilon_{t+1}^p, u - w_{t+1} \rangle \\ & \leq \frac{c(p)a}{2\eta} \|w_{t+1} - w_t\|_M^2 + \frac{c(p)}{2a\eta} \|u - w_{t+1}\|_M^2. \end{aligned}$$

Applying this to Lemma 4 yields

$$\begin{aligned} & \langle \tilde{\nabla}_t, w_t - u \rangle + \psi(w_{t+1}) - \psi(u) \\ & \leq \langle \tilde{\nabla}_t, w_t - w_{t+1} \rangle + \frac{\|u - w_t\|_M^2}{2\eta} \\ & \quad - \frac{1}{2\eta} \|u - w_{t+1}\|_M^2 - \frac{1}{2\eta} \|w_{t+1} - w_t\|_M^2 \\ & \quad + \langle M\varepsilon_{t+1}^p, u - w_{t+1} \rangle \\ & \langle \tilde{\nabla}_t, w_t - w_{t+1} \rangle + \frac{\|u - w_t\|_M^2}{2\eta} \\ & \quad - (\frac{1}{2\eta} - \frac{c(p)}{2a\eta}) \|u - w_{t+1}\|_M^2 \\ & \quad - (\frac{1}{2\eta} - \frac{c(p)a}{2\eta}) \|w_{t+1} - w_t\|_M^2 \end{aligned}$$

Applying this to (B.2), we arrive at

$$\begin{aligned} & \mathbb{E}[F(w_{t+1}) - F(u)] \\ & \leq \mathbb{E}[\langle \tilde{\nabla}_t - \nabla f(w_t), w_t - w_{t+1} \rangle \\ & \quad - \frac{1 - c(p)a - \eta L_f^M}{2\eta} \|w_t - w_{t+1}\|_M^2 \\ & \quad + \frac{1 - \eta\sigma_f^M}{2\eta} \|u - w_t\|_M^2 - (\frac{1}{2\eta} - \frac{c(p)}{2a\eta}) \|u - w_{t+1}\|_M^2] \\ & \mathbb{E}[\frac{\eta}{2(1 - c(p)a - \eta L_f^M)} \|\tilde{\nabla}_t - \nabla f(w_t)\|_{M^{-1}}^2 \\ & \quad + \frac{1 - \eta\sigma_f^M}{2\eta} \|u - w_t\|_M^2 - (\frac{1}{2\eta} - \frac{c(p)}{2a\eta}) \|u - w_{t+1}\|_M^2], \end{aligned}$$

where in the second inequality we have applied

$$\begin{aligned} \langle u_1, u_2 \rangle & = \langle M^{-\frac{1}{2}} u_1, M^{\frac{1}{2}} u_2 \rangle \leq \|u_1\|_{M^{-1}} \|u_2\|_M \\ & \leq \frac{1}{2b} \|u_1\|_{M^{-1}}^2 + \frac{b}{2} \|u_2\|_M^2 \quad \text{for any } b > 0. \end{aligned}$$

Finally, since  $\eta \leq \frac{1-2c(p)a}{2L_f^M}$ , we have  $\frac{\eta}{2(1-c(p)a-\eta L_f^M)} \leq \eta$ , which gives the desired result.  $\square$

**Lemma 6.** *Under Assumption 1, we have*

$$\mathbb{E}[\|\tilde{\nabla}_t - \nabla f(w_t)\|_{M^{-1}}^2] \leq (L_f^M)^2 \|w_0 - w_t\|_M^2.$$

*Proof.* We have

$$\begin{aligned}
 & \mathbb{E}[\|\tilde{\nabla}_t - \nabla f(w_t)\|_{M^{-1}}^2] \\
 &= \mathbb{E}[\|\nabla f(w_0) + \nabla f_{i_t}(w_t) - \nabla f_{i_t}(w_0) - \nabla f(w_t)\|_{M^{-1}}^2] \\
 &= \mathbb{E}[\|(\nabla f_{i_t}(w_t) - \nabla f_{i_t}(w_0)) - (\nabla f(w_t) - \nabla f(w_0))\|_{M^{-1}}^2] \\
 &\leq \mathbb{E}[\|\nabla f_{i_t}(w_t) - \nabla f_{i_t}(w_0)\|_{M^{-1}}^2] \\
 &\leq (L_f^M)^2 \|w_t - w_0\|_M^2,
 \end{aligned}$$

where in the first inequality, we have applied  $\mathbb{E}[\|\xi - \mathbb{E}\xi\|^2] = \mathbb{E}[\|\xi\|^2] - \|\mathbb{E}\xi\|^2$  with  $\xi = M^{-\frac{1}{2}}(\nabla f_{i_t}(w_t) - \nabla f_{i_t}(w_0))$ , and in the second inequality follows from Assumption 1.  $\square$

**Lemma 7. (Fact 2.3 of (Allen-Zhu, 2018)).** Let  $C_1, C_2, \dots$  be a sequence of numbers, and  $N \sim \mathbf{Geom}(p)$ , then

1.  $\mathbb{E}_N [C_N - C_{N+1}] = \frac{p}{1-p} \mathbb{E}_N [C_0 - C_N]$ , and
2.  $\mathbb{E}_N [C_N] = (1-p)\mathbb{E}[C_{N+1}] + pC_0$ .

**Lemma 8.** Under Assumption 1, if  $\eta \leq \min\{\frac{1-2c(p)a}{2L_f^M}, \frac{1}{2\sqrt{m}L_f^M}\}$  and  $m \geq 2$ , then, for any  $u \in \mathbb{R}^d$  we have

$$\begin{aligned}
 & \mathbb{E}[F(w_{D+1}) - F(u)] \\
 &\leq \mathbb{E}\left[-\frac{1}{4m\eta} \|w_{D+1} - w_0\|_M^2 + \frac{\langle w_0 - w_{D+1}, w_0 - u \rangle_M}{m\eta} \right. \\
 &\quad \left. - \left(\frac{\sigma_f^M}{4} - \frac{c(p)}{2a\eta}\right) \|w_{D+1} - u\|_M^2\right].
 \end{aligned}$$

*Proof.* By Lemmas 5 and 6, we know that

$$\begin{aligned}
 & \mathbb{E}[F(w_{t+1}) - F(u)] \\
 & \mathbb{E}[\eta(L_f^M)^2 \|w_0 - w_t\|_M^2 + \frac{1 - \eta\sigma_f^M}{2\eta} \|u - w_t\|_M^2 \\
 & - \left(\frac{1}{2\eta} - \frac{c(p)}{2\eta a}\right) \|u - w_{t+1}\|_M^2].
 \end{aligned}$$

Let  $D \sim \mathbf{Geom}(\frac{1}{m})$  as in Algorithm 1 and take  $t = D$ , then

$$\begin{aligned}
 & \mathbb{E}[F(w_{D+1}) - F(u)] \\
 &\leq \mathbb{E}[\eta(L_f^M)^2 \|w_0 - w_D\|_M^2 + \frac{1}{2\eta} \|u - w_D\|_M^2 \\
 &\quad - \frac{1}{2\eta} \|u - w_{D+1}\|_M^2 - \frac{\sigma_f^M}{2} \|u - w_D\|_M^2 \\
 &\quad + \frac{c(p)}{2\eta a} \|u - w_{D+1}\|_M^2] \\
 &= \mathbb{E}[\eta(L_f^M)^2 \|w_D - w_0\|_M^2 + \frac{\|u - w_0\|_M^2 - \|u - w_D\|_M^2}{2(m-1)\eta} \\
 &\quad - \frac{\sigma_f^M}{2} \|u - w_D\|_M^2 + \frac{c(p)}{2a\eta} \|u - w_{D+1}\|_M^2] \\
 &= \mathbb{E}\left[\frac{m-1}{m} \eta(L_f^M)^2 \|w_{D+1} - w_0\|_M^2 \right. \\
 &\quad \left. + \frac{\|u - w_0\|_M^2 - \|u - w_{D+1}\|_M^2}{2m\eta} \right. \\
 &\quad \left. - \frac{\sigma_f^M}{2m} \|u - w_0\|_M^2 - \frac{\sigma_f^M(m-1)}{2m} \|u - w_{D+1}\|_M^2 \right. \\
 &\quad \left. + \frac{c(p)}{2a\eta} \|u - w_{D+1}\|_M^2\right] \\
 &\leq \mathbb{E}[\eta(L_f^M)^2 \|w_{D+1} - w_0\|_M^2 + \frac{\|u - w_0\|_M^2 - \|u - w_{D+1}\|_M^2}{2m\eta} \\
 &\quad - \frac{\sigma_f^M}{4} \|u - w_{D+1}\|_M^2 + \frac{c(p)}{2a\eta} \|u - w_{D+1}\|_M^2] \\
 &\leq \mathbb{E}\left[-\frac{1}{4m\eta} \|w_0 - w_{D+1}\|_M^2 \right. \\
 &\quad \left. + \frac{\|u - w_0\|_M^2 - \|u - w_{D+1}\|_M^2 + \|w_0 - w_{D+1}\|_M^2}{2m\eta} \right. \\
 &\quad \left. - \frac{\sigma_f^M}{4} \|w_{D+1} - u\|_M^2 + \frac{c(p)}{2a\eta} \|u - w_{D+1}\|_M^2\right] \\
 &= \mathbb{E}\left[-\frac{1}{4m\eta} \|w_{D+1} - w_0\|_M^2 + \frac{\langle w_0 - w_{D+1}, w_0 - u \rangle_M}{m\eta} \right. \\
 &\quad \left. - \left(\frac{\sigma_f^M}{4} - \frac{c(p)}{2a\eta}\right) \|w_{D+1} - u\|_M^2\right],
 \end{aligned}$$

where the first equality follows from the item 1 of Lemma 7 with  $C_N = \|u - w_N\|_M^2$ , the second inequality follows from item 2 with  $C_N = \|w_d - w_0\|_M^2$ , item 2 with  $C_N = \|u - w_0\|_M^2 - \|u - w_N\|_M^2$ , and item 1 with  $C_N = \|u - w_D\|_M^2$ , then third inequality makes use of  $m \geq 2$  and the fourth inequality makes use of  $\eta \leq \frac{1}{2\sqrt{m}L_f^M}$ .  $\square$

Now, let us proceed to prove Theorem 1. With Lemma 8, it can be proved in a similar way as Theorem 3 of (Hannah et al., 2018b).

*Proof of Theorem 1.* Without loss of generality, we can as-

sume  $x^* = \arg \min_{x \in \mathbb{R}^d} F(x) = \mathbf{0}$  and  $F(x^*) = 0$ .

According to Lemma 8, for any  $u \in \mathbb{R}^d$ , and  $\eta \leq \min\{\frac{1-2c(p)a}{2L_f^M}, \frac{1}{2\sqrt{m}L_f^M}\}$  we have

$$\begin{aligned} & \mathbb{E}[F(x^{j+1}) - F(u)] \\ & \leq \mathbb{E}\left[-\frac{1}{4m\eta}\|x^{j+1} - x^j\|_M^2\right. \\ & \quad \left. + \frac{\langle x^j - x^{j+1}, x^j - u \rangle_M}{m\eta} - \left(\frac{\sigma_f^M}{4} - \frac{c(p)}{2a\eta}\right)\|x^{j+1} - u\|_M^2\right], \end{aligned}$$

or equivalently,

$$\begin{aligned} & \mathbb{E}[F(x^{j+1}) - F(u)] \\ & \leq \mathbb{E}\left[\frac{1}{4m\eta}\|x^{j+1} - x^j\|_M^2 + \frac{1}{2m\eta}\|x^j - u\|_M^2\right. \\ & \quad \left. - \frac{1}{2m\eta}\|x^{j+1} - u\|_M^2 - \left(\frac{\sigma_f^M}{4} - \frac{c(p)}{2a\eta}\right)\|x^{j+1} - u\|_M^2\right]. \end{aligned}$$

In the following proof, we will omit  $\mathbb{E}$ .

Setting  $u = x^* = 0$  and  $u = x^j$  yields the following two inequalities:

$$\begin{aligned} F(x^{j+1}) & \leq \frac{1}{4m\eta}(\|x^{j+1} - x^j\|_M^2 + 2\|x^j\|_M^2) \\ & \quad - \frac{1}{2m\eta}\left(1 + \frac{1}{2}m\eta(\sigma_f^M - \frac{2c(p)}{a\eta})\right)\|x^{j+1}\|_M^2, \end{aligned} \quad (\text{B.3})$$

$$F(x^{j+1}) - F(x^j) \quad (\text{B.4})$$

$$\leq -\frac{1}{4m\eta}\left(1 + m\eta\left(\sigma_f^M - \frac{2c(p)}{a\eta}\right)\right)\|x^{j+1} - x^j\|_M^2. \quad (\text{B.5})$$

Define  $\tau = \frac{1}{2}m\eta(\sigma_f^M - \frac{2c(p)}{a\eta})$ , multiply  $(1 + 2\tau)$  to (B.3), then add it to (B.5) yields

$$\begin{aligned} & 2(1 + \tau)F(x^{j+1}) - F(x^j) \\ & \leq \frac{1}{2m\eta}(1 + 2\tau)(\|x^j\|_M^2 - (1 + \tau)\|x^{j+1}\|_M^2). \end{aligned}$$

Multiplying both sides by  $(1 + \tau)^j$  gives

$$\begin{aligned} & 2(1 + \tau)^{j+1}F(x^{j+1}) - (1 + \tau)^jF(x^j) \\ & \leq \frac{1}{2m\eta}(1 + 2\tau)((1 + \tau)^j\|x^j\|_M^2 - (1 + \tau)^{j+1}\|x^{j+1}\|_M^2). \end{aligned}$$

Summing over  $j = 0, 1, \dots, k-1$ , we have

$$\begin{aligned} & (1 + \tau)^k F(x^k) + \sum_{j=0}^{k-1} (1 + \tau)^j F(x^j) - F(x^0) \\ & \leq \frac{1}{2m\eta}(1 + 2\tau)(\|x^0\|_M^2 - (1 + \tau)^k \|x^k\|_M^2). \end{aligned}$$

Since  $F(x^j) \geq 0$ , we have

$$F(x^k)(1 + \tau)^k \leq F(x^0) + \frac{1}{2m\eta}(1 + 2\tau)\|x^0\|_M^2.$$

By the strong convexity of  $F$ , we have  $F(x^0) \geq \frac{\sigma_f^M}{2}\|x^0\|_M^2$ , therefore

$$F(x^k)(1 + \tau)^k \leq F(x^0)\left(2 + \frac{1}{2\tau}\right). \quad (\text{B.6})$$

Finally, recall that  $a > 0$  can be chosen arbitrarily, so we can take

$$a = \frac{4c(p)}{\eta\sigma_f^M},$$

and

$$\begin{aligned} \eta & \leq \min\left\{\frac{1 - 2c(p)a}{2L_f^M}, \frac{1}{2\sqrt{m}L_f^M}\right\} \\ & = \min\left\{\frac{1 - \frac{8c^2(p)}{\eta\sigma_f^M}}{2L_f^M}, \frac{1}{2\sqrt{m}L_f^M}\right\}, \end{aligned} \quad (\text{B.7})$$

$$\tau = \frac{1}{2}m\eta\left(\sigma_f^M - \frac{2c(p)}{a\eta}\right) = \frac{1}{4}m\eta\sigma_f^M.$$

In order for the choice of  $\eta$  in (B.7) to be possible, we need

$$2L_f^M\eta^2 - \eta + 8\frac{c^2(p)}{\sigma_f^M} \leq 0 \quad (\text{B.8})$$

to have one solution at least, which requires

$$64\kappa_f^M c^2(p) \leq 1,$$

under which  $\eta = \frac{1}{4L_f^M}$  satisfy (B.8). As a result,  $m \geq 4$  makes (B.7) into

$$\eta \leq \frac{1}{2\sqrt{m}L_f^M},$$

and the desired convergence result follows from (B.6).  $\square$

## C. Proof of Lemma 2

*Proof.* From Lemma 1, we know that

$$c(p) = 14\kappa(M)\frac{\tau^p}{1 - \tau^p},$$

where

$$\tau \leq \exp\left(-\frac{1}{2e\sqrt{\kappa(M)} + 1}\right).$$

Therefore, in order for  $64\kappa_f^M c^2(p) \leq 1$ , we need

$$\kappa_f^M \kappa^2(M) \left(\frac{\tau^p}{1 - \tau^p}\right)^2 \leq \frac{1}{64 \times 14^2} = c_1,$$

which is equivalent to

$$\tau^p \leq \frac{c_1}{\sqrt{\kappa_f^M \kappa(M)} + \sqrt{c_1}}.$$

Thus, it suffices to require that

$$\left[\exp\left(-\frac{1}{2e\sqrt{\kappa(M)} + 1}\right)\right]^p \leq \frac{c}{\sqrt{\kappa_f^M \kappa(M)} + \sqrt{c_1}},$$

which gives

$$p \geq (2e\sqrt{\kappa(M)} + 1) \ln \frac{\sqrt{\kappa_f^M \kappa(M)} + \sqrt{c_1}}{c_1}.$$

□

## D. Proof of Theorem 2

The proof of Theorem 2 is similar to that of Theorem 4.3 of (Allen-Zhu, 2018), so we provide a proof sketch here and omit the details.

1. In (Allen-Zhu, 2018), the proof of Theorem 4.3 is based on Lemma 3.3, here the proof of Theorem 2 is based on Lemma 8, which is an analog of Lemma of 3.3 in our settings.
2. Based on Lemma 8, the proof of Theorem 2 follows in nearly the same way as Theorem 4.3 of (Allen-Zhu, 2018), the only difference is that one needs to replace  $\sigma$  by  $\sigma_f^M - \frac{2c(p)}{a\eta}$ .
3. By setting

$$a = \frac{4c(p)}{\eta\sigma_f^M},$$

and

$$64\kappa_f^M c^2(p) \leq 1$$

as in the proof of Theorem 1, the  $\tau$  in Theorem 4.3 of (Allen-Zhu, 2018) becomes  $\frac{1}{2}m\eta\sigma_f^M$ , and the convergence result of Theorem 2 follows.

## E. Proof of Theorems 3 and 4

*Proof of Theorem 3.* From Remark 5, we know that the gradient complexity of SVRG can be expressed as

$$C_1(m, \varepsilon) = \mathcal{O}\left(\frac{n+m}{\ln(1 + \frac{1}{4}m\eta\sigma_f)} \ln \frac{1}{\varepsilon}\right).$$

Taking the largest possible step size  $\eta = \frac{1}{2\sqrt{m}L_f}$  as in Theorem 1, we have

$$C_1(m, \varepsilon) = \mathcal{O}\left(\frac{n+m}{\ln(1 + \frac{\sqrt{m}}{8\kappa_f})} \ln \frac{1}{\varepsilon}\right).$$

Let us first find the optimal  $m = m^*$  for SVRG, let

$$g(m) = \frac{n+m}{\ln(1 + \frac{\sqrt{m}}{8\kappa_f})},$$

then

$$g'(m) = \frac{\ln(1 + \frac{\sqrt{m}}{8\kappa_f}) - \frac{\frac{\sqrt{m}}{8\kappa_f}}{1 + \frac{\sqrt{m}}{8\kappa_f}} \frac{n+m}{2m}}{\ln^2(1+z)}.$$

Taking derivative to the numerator gives

$$\begin{aligned} & \left[\ln(1 + \frac{\sqrt{m}}{8\kappa_f}) - \frac{\frac{\sqrt{m}}{8\kappa_f}}{1 + \frac{\sqrt{m}}{8\kappa_f}} \frac{n+m}{2m}\right]' \\ &= (n+m) \frac{\frac{1}{32\kappa_f} m^{-\frac{3}{2}} + 2 \frac{m^{-1}}{(16\kappa_f)^2}}{(1 + \frac{\sqrt{m}}{8\kappa_f})^2} > 0, \end{aligned}$$

Therefore,  $m^*$  is given by  $g'(m) = 0$ . Let  $z = \frac{\sqrt{m}}{8\kappa_f} > 0$ , then

$$g'(m) = \frac{\ln(1+z) - \frac{z}{1+z} \frac{n+m}{2m}}{\ln^2(1+z)}.$$

Since  $\ln(1+z) > \frac{z}{1+z}$  for  $z > 0$ , we know that  $g'(n) > 0$ , therefore,  $m^* < n$ .

Let  $m = n^s$  where  $0 < s < 1$ , we would like to have  $g'(n^s) < 0$ , i.e.,

$$\frac{\ln(1+z)}{\frac{z}{1+z}} < \frac{1+n^{1-s}}{2}.$$

so that  $m^* \in (n^s, n)$ .

Since  $\kappa_f > n^{\frac{1}{2}}$ , we have  $z = \frac{\sqrt{m}}{8\kappa_f} < \frac{1}{8}$ , on the other hand, we have

$$\left[\frac{\ln(1+z)}{\frac{z}{1+z}} < \frac{1+n^{1-s}}{2}\right]'_z > 0.$$

Therefore, it suffices to have

$$n^{1-s} > 18 \ln \frac{9}{8} - 1 := c_0 > 1.$$

As a result, we have  $m^* \in (\frac{n}{c_0}, n)$ , and

$$\begin{aligned} C_1(m^*, \varepsilon) &= \mathcal{O}\left(\frac{n+m^*}{\ln(1 + \frac{\sqrt{m^*}}{8\kappa_f})} \ln \frac{1}{\varepsilon}\right) \\ &= \mathcal{O}\left(\frac{n}{\frac{\sqrt{n}}{8\kappa_f}} \ln \frac{1}{\varepsilon}\right) = \mathcal{O}(\kappa_f \sqrt{n} \ln \frac{1}{\varepsilon}), \end{aligned}$$

where in the second equality we have used  $\kappa_f > n^{\frac{1}{2}}$ .

For our iPreSVRG in Algorithm 1, we have

$$C'_1(m, \varepsilon) = \mathcal{O}\left(\frac{n + (1+pd)m}{\ln(1 + \frac{1}{4}m\eta\sigma^M)} \ln \frac{1}{\varepsilon}\right),$$

thanks to Lemma 2,  $p$  can be chosen as

$$p = \mathcal{O}(\sqrt{\kappa(M)} \ln(\sqrt{\kappa_f^M} \kappa(M))),$$

furthermore, we can take  $\eta = \frac{1}{2\sqrt{m}L_f}$  due to Theorem 1.

Under these settings, we have

$$C'_1(m, \varepsilon) = \mathcal{O}\left(\frac{n + (1 + pd)m}{\ln(1 + \frac{1}{8} \frac{\sqrt{m}}{\kappa_f^M})} \ln \frac{1}{\varepsilon}\right).$$

Let us take  $m = m' = \lceil \frac{n}{1+pd} \rceil$ .

If  $n > 1 + pd$ , or equivalently  $\kappa_f < n^2 d^{-2}$ , then

$$C'_1(m', \varepsilon) = \mathcal{O}\left(\frac{n}{\ln(1 + \frac{1}{8} \frac{\sqrt{n}}{\sqrt{pd}\kappa_f^M})} \ln \frac{1}{\varepsilon}\right).$$

Since  $p = \mathcal{O}\left(\sqrt{\kappa(M)} \ln(\sqrt{\kappa_f^M} \kappa(M))\right)$ , we know that when  $(\kappa_f^M)^2 \sqrt{\kappa(M)} d < n$ , or equivalently  $\kappa_f < n^2 d^{-2}$ , we have

$$\ln\left(1 + \frac{1}{8} \frac{\sqrt{n}}{\sqrt{pd}\kappa_f^M}\right) = \mathcal{O}(\ln n),$$

therefore

$$C'_1(m', \varepsilon) = \mathcal{O}\left(n \ln \frac{1}{\varepsilon}\right),$$

and

$$\frac{\min_{m \geq 1} C'_1(m, \varepsilon)}{\min_{m \geq 1} C_1(m, \varepsilon)} \leq \frac{C'_1(m', \varepsilon)}{C_1(m^*, \varepsilon)} = \mathcal{O}\left(\frac{\sqrt{n}}{\kappa_f}\right).$$

If  $n \leq 1 + pd$ , or equivalently  $\kappa_f > n^2 d^{-2}$ , then  $m = 1$  and

$$C'_1(m, \varepsilon) = \mathcal{O}\left(\frac{\sqrt{\kappa(M)} d}{\ln(1 + \frac{1}{8} \frac{1}{\kappa_f^M})} \ln \frac{1}{\varepsilon}\right),$$

therefore

$$\frac{\min_{m \geq 1} C'_1(m, \varepsilon)}{\min_{m \geq 1} C_1(m, \varepsilon)} \leq \frac{C'_1(1, \varepsilon)}{C_1(m^*, \varepsilon)} = \mathcal{O}\left(\frac{\sqrt{\kappa(M)} d}{\kappa_f \sqrt{n} \ln(1 + \frac{1}{8} \frac{1}{\kappa_f^M})}\right).$$

Since  $\kappa(M) \approx \kappa_f \gg \kappa_f^M$ , this ratio becomes  $\mathcal{O}\left(\frac{d}{\sqrt{n}\kappa_f}\right)$   $\square$

*Proof of Theorem 4.* The proof of Theorem 4 is similar and is omitted.  $\square$
